# Supplementary material for: Targeting the Spike: Repurposing Mithramycin and Dihydroergotamine to Block SARS-CoV-2 Infection
Source: PubMed Central journal article supplement — ACS Omega. 2023 Nov 13;8(46):43490–9. doi: 10.1021/acsomega.3c02921 (PMC10666140; doi:10.1021/acsomega.3c02921), 2023-11-13
Supplement: ao3c02921_si_001.pdf [file ao3c02921_si_001.pdf]

# Targeting the Spike: Repurposing mithramycin and dihydroergotamine to Block SARS-CoV-2 Infection.

*Soledad Stagnoli<sup>1</sup>, Gabriele Macari<sup>2</sup>, Pietro Corsi<sup>2</sup>*

*Barbara Capone<sup>2</sup>, Ander Vidaurrezaga<sup>1</sup>, June Ereño-Orbea<sup>4,5</sup>, Ana Ardá<sup>4</sup>, Fabio Polticelli<sup>2,3</sup>, Jesus Jimenez-Barbero<sup>4,5,6,7</sup>, Nicola GA Abrescia<sup>1,5,8</sup>, Ivan Coluzza<sup>5,9\*</sup>*

<sup>1</sup>Structure and Cell Biology of Viruses Lab, Center for Cooperative Research in Biosciences (CIC bioGUNE) Basque Research and Technology Alliance (BRTA); Derio, Spain.

<sup>2</sup> Department of Sciences, University of Rome Tre, Rome, Italy

<sup>3</sup> National Institute of Nuclear Physics, Roma Tre Section, Rome, Italy

<sup>4</sup>Chemical Glycobiology Laboratory, CIC bioGUNE, BRTA, Derio, Spain.

<sup>5</sup>IKERBASQUE, Basque Foundation for Science; Bilbao, Spain.

<sup>6</sup>Centro de Investigación Biomédica En Red de Enfermedades Respiratorias. (CIBERES), Instituto de Salud Carlos III; Madrid, Spain.

<sup>7</sup>Department of Organic & Inorganic Chemistry, Faculty of Science and Technology University of the Basque Country, EHU-UPV, 48940 Leioa, Spain.

<sup>8</sup>Centro de Investigación Biomédica en Red de Enfermedades Hepáticas y Digestivas (CIBERehd), Instituto de Salud Carlos III; Madrid, Spain.

<sup>9</sup>Computational Soft Matter and Biophysics Lab, Basque Center for Materials, Applications and Nanostructures (BCMaterials), Buil. Martina Casiano, Pl. 3 Parque Científico UPV/EHU Barrio Sarriena, Leioa 48940, Spain.

\*Corresponding author. Email: [ivan.coluzza@bcmaterials.net](mailto:ivan.coluzza@bcmaterials.net)

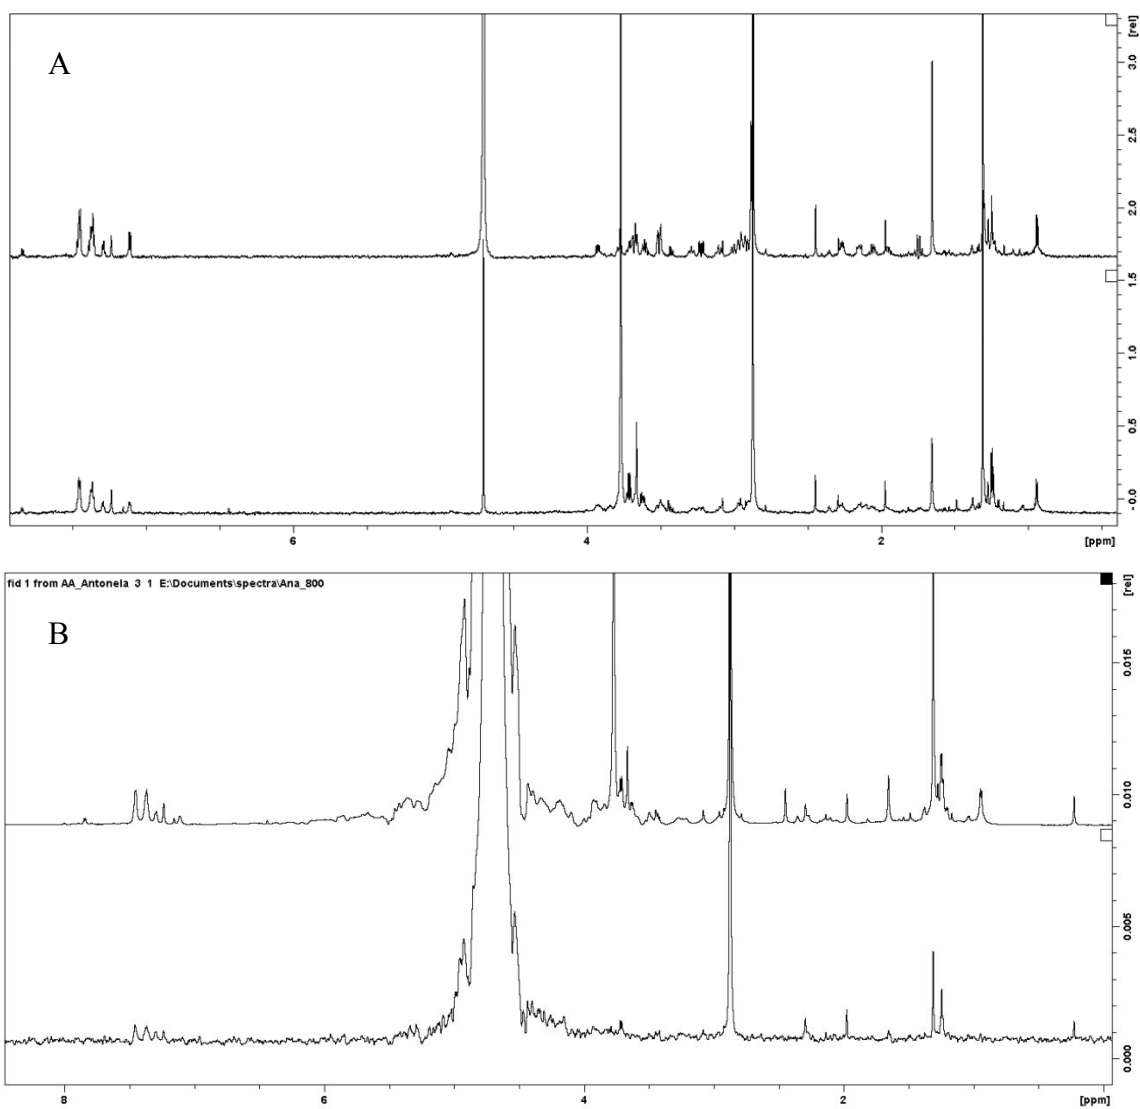

**Fig.S1: NMR experiments.** **A)**  $^1\text{H}$ -NMR full spectra of Dihydroergotamine free (above) and in the presence of Spike protein (below) **B)**  $^1\text{H}$ -STD-NMR experiment ( $I_b=6\text{Hz}$ ) of dihydroergotamine in the presence of Spike protein: STD spectrum below and corresponding off-resonance (reference) spectrum on top.

**A**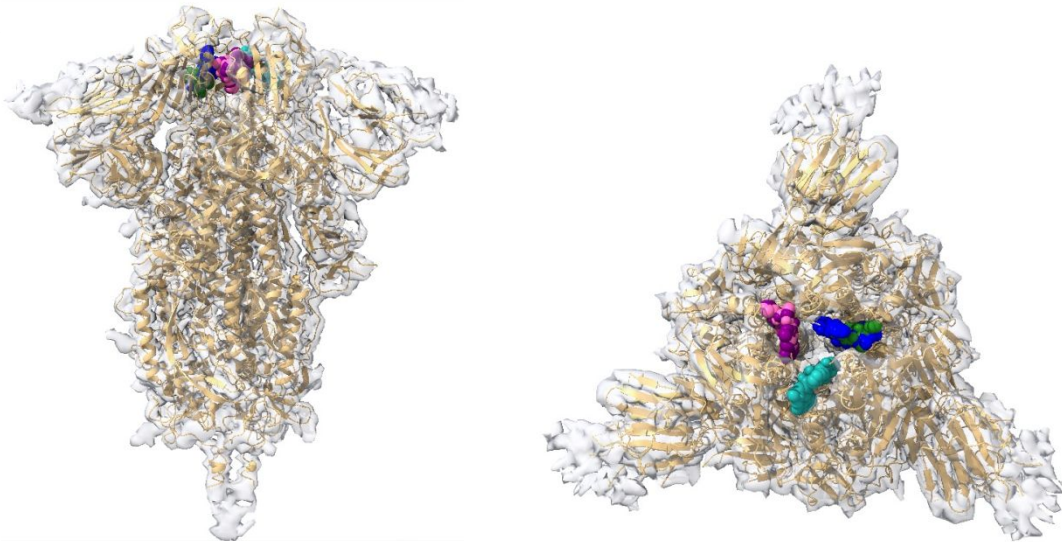**B**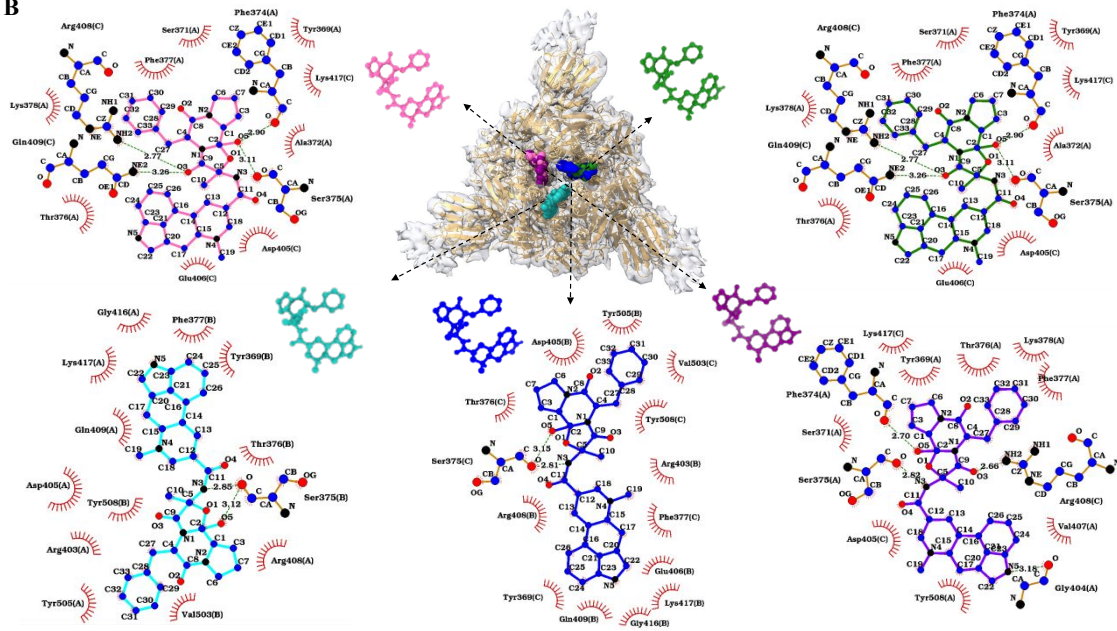

**Fig. S2:** Representation of docking poses of Dihydroergotamine over the apical region of the RBD-Spike protein with the highest binding affinities (-9.1 kcal/mol) . A) Views of the spike protein from the top and sides (EMDB: 21452). B) Locations in the apical region where the ligand's various conformations interact with RBD.

A

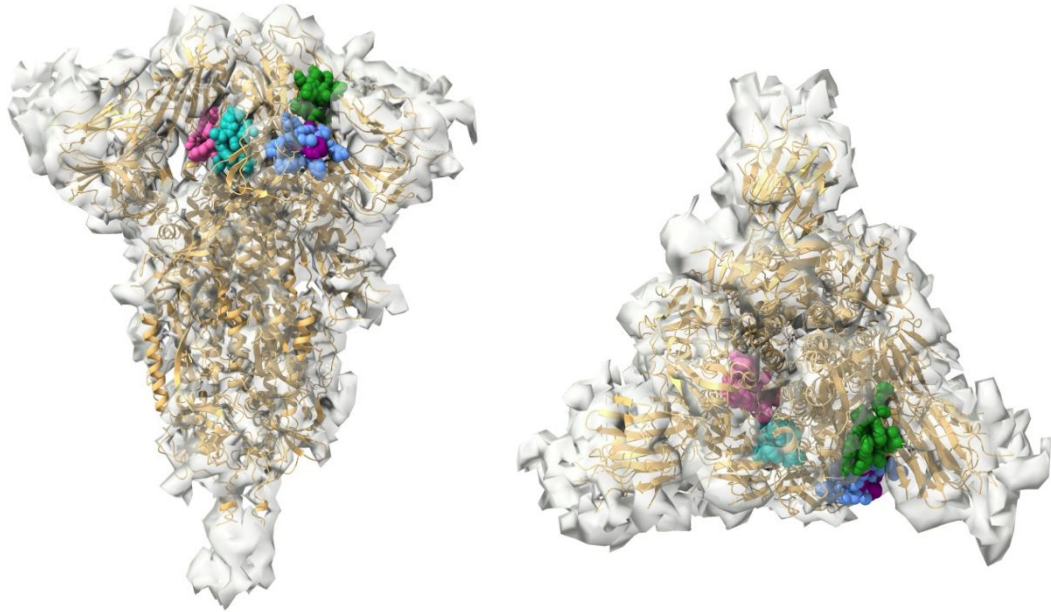

B

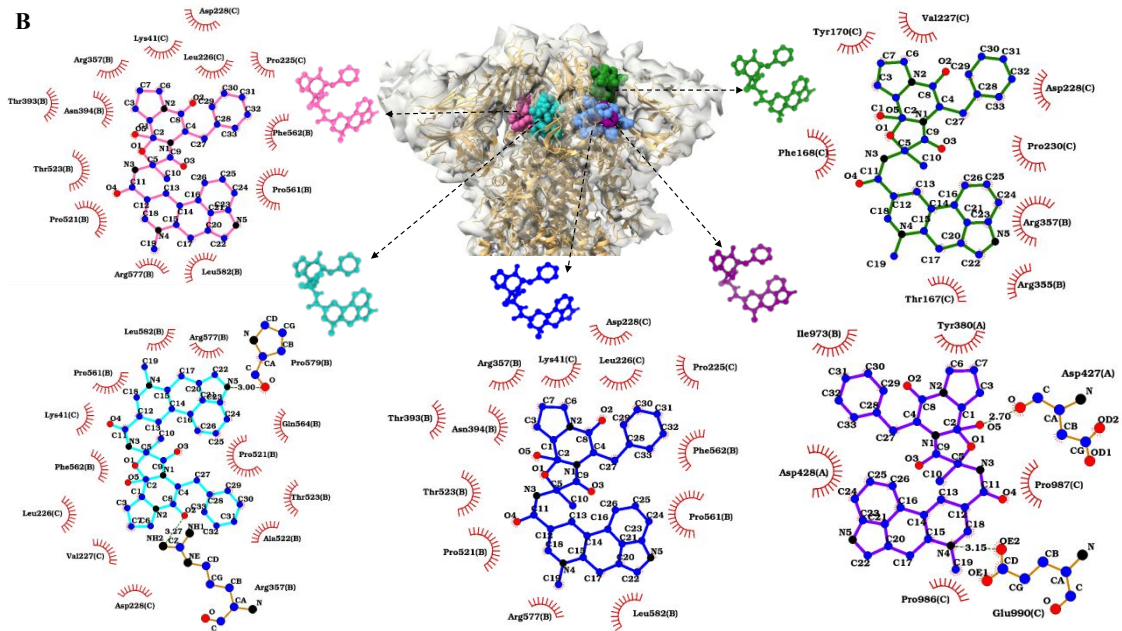

**Fig. S3:** Representation of docking poses of Dihydroergotamine over the lateral region of the RBD-Spike protein with the highest binding affinities (-9.4 kcal/mol) . A) Views of the spike protein from the top and sides (EMDB: 21452). B) Locations in the apical region where the ligand's various conformations interact with RBD

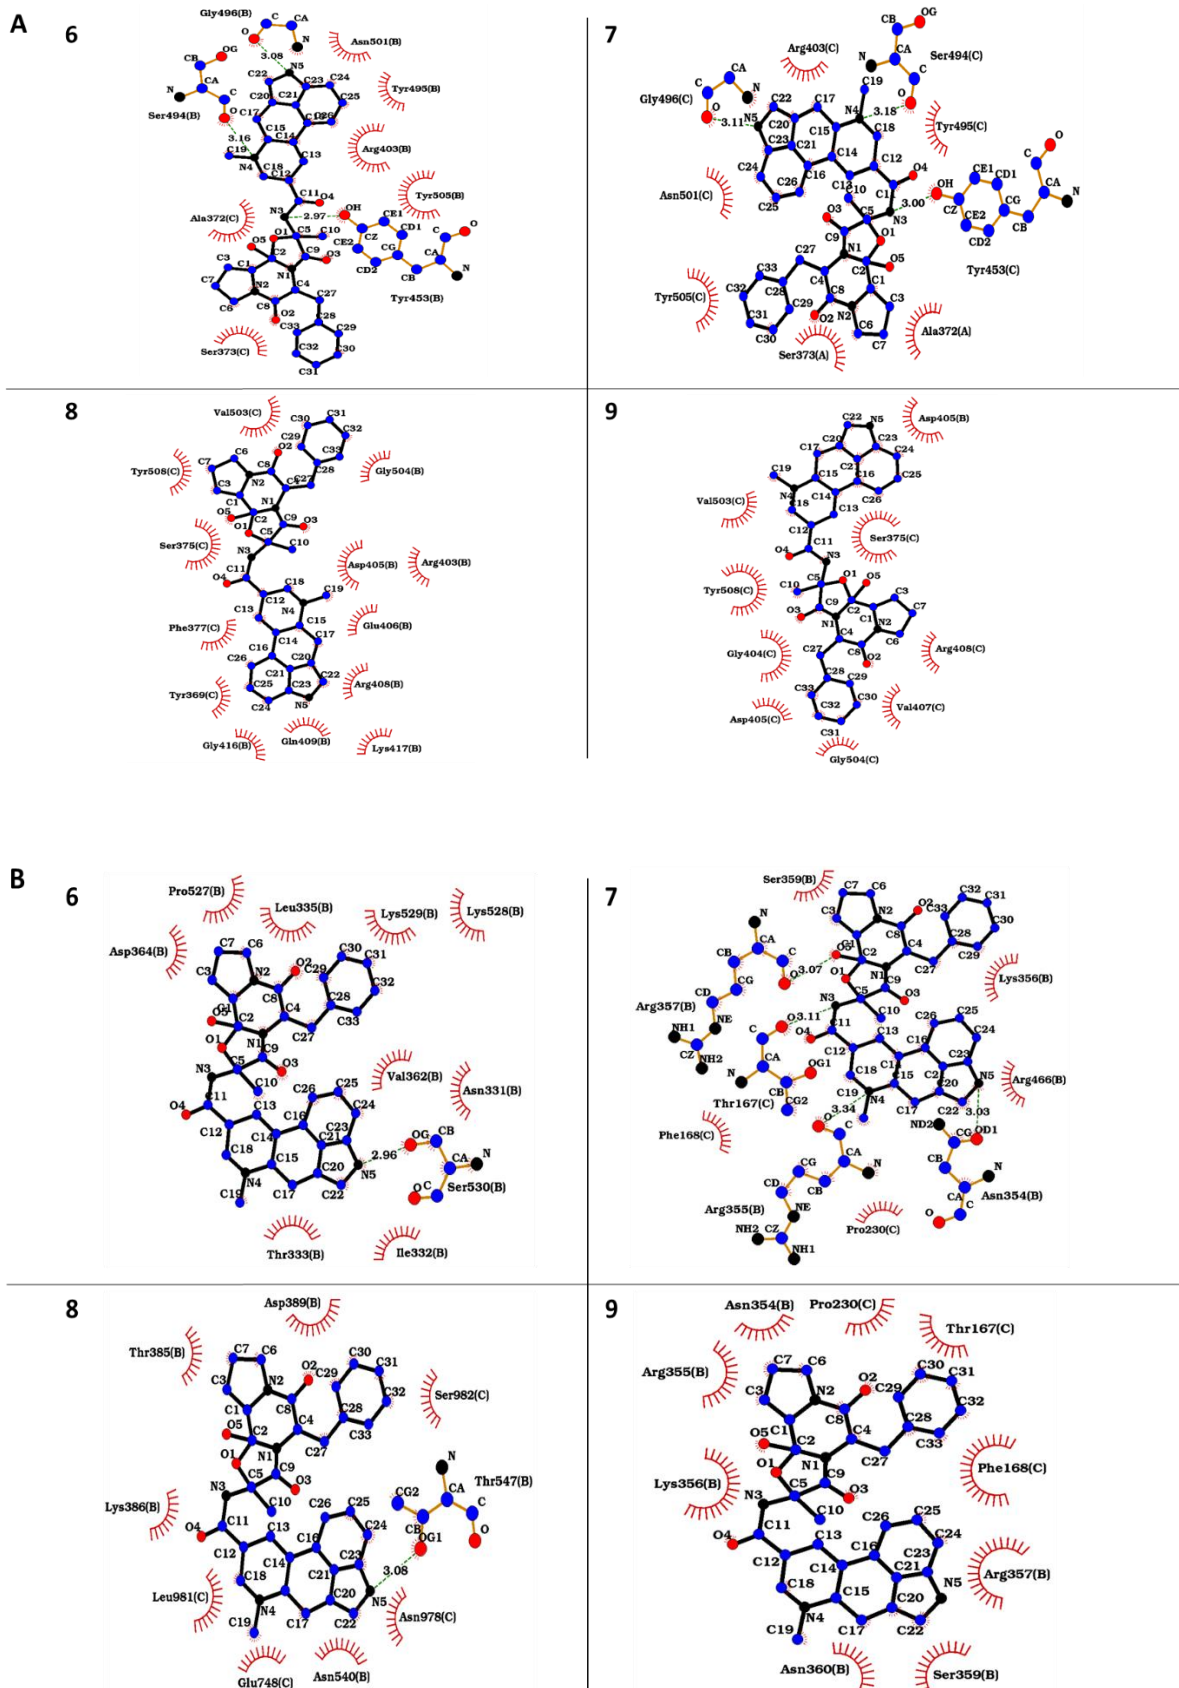

Fig. S4: 2D Plot of the remaining docking poses of Dihydroergotamine: A) over the apical region where the ligand's various conformations interact with RBD (from left to right - 8.6, -8.6, -8.5, -8.4 kcal/mol); B) over the lateral region where the ligand's various conformations interact with RBD (from left to right -9.3, -9.0, -9.0, -8.9 kcal/mol).

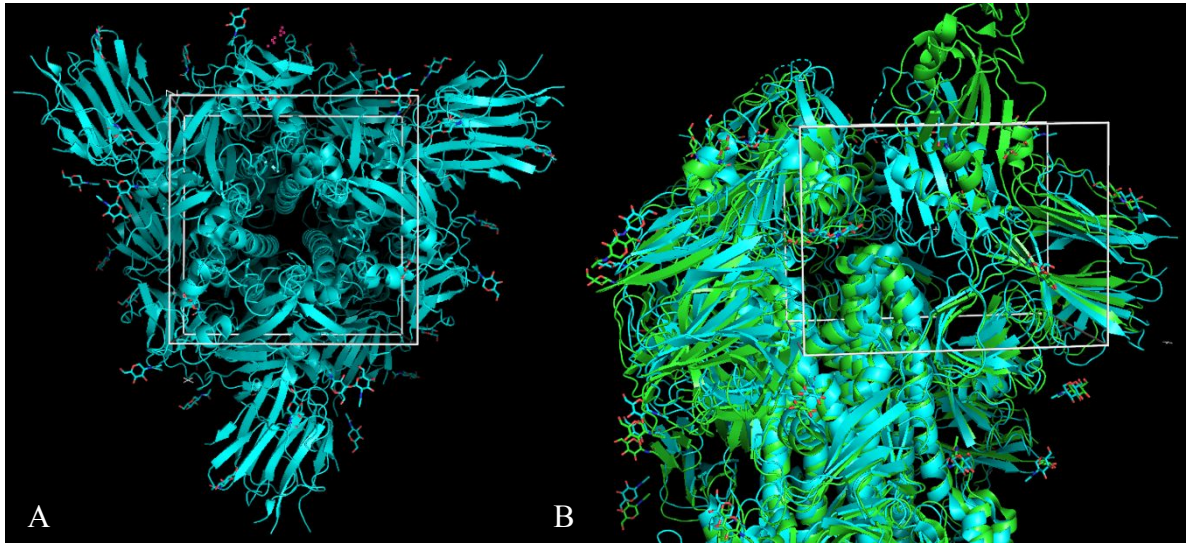

**Fig S5:** Schematic Representation of Docking Search Grids. (a) Depiction of the apical search grid used for the docking simulations, delineated by a cube with dimensions 47x47x47 nm, centered on the apical region of the SARS-CoV-2 spike protein. (b) Illustration of the lateral search grid for docking studies, defined by a cuboidal area of 52x44x38 nm, encompassing the lateral domain of the spike protein. In green we show the open configuration while in blue the closed one. These grids indicate the specific regions targeted during our in silico docking analyses, providing spatial context to our simulation approach.
